# Supplementary material for: Removing low-frequency artefacts from Datawell DWR-G4 wave buoy measurements
Source: Copernicus journal article supplement (doi:10.5194/gi-5-17-2016), 2016-02-05
Supplement: Supplementary file 1 [file gi-5-17-2016-supplement.zip]

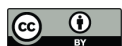

*Supplement of*

## **Removing low-frequency artefacts from Datawell DWR-G4 wave buoy measurements**

**J.-V. Björkqvist et al.**

*Correspondence to:* J.-V. Björkqvist ([jan-victor.bjorkqvist@fmi.fi](mailto:jan-victor.bjorkqvist@fmi.fi))

- [gi-5-17-2016-supplement-title-page.pdf](#)
- [DWR\\_wave\\_spectra.zip](#)
- [G4\\_wave\\_spectra.zip](#)
- [detrend\\_wavespec.m](#)

The copyright of individual parts of the supplement might differ from the CC-BY 3.0 licence.
